# Supplementary material for: A novel coumarin-based fluorescence chemosensor containingl-histidine for aluminium(iii) ions in aqueous solution
Source: Royal Society of Chemistry journal article supplement (doi:10.1039/c5ay01466b), 2015-01-01
Supplement: c5ay01466b1.pdf [file c5ay01466b1.pdf]

SUPPLEMENTARY MATERIAL

A novel coumarin-based fluorescence chemosensor containing L-histidine for  
aluminium(III) ions in aqueous solution

Li-Qiang Yan,<sup>A</sup>, Yun Ma,<sup>A</sup> Mei-Fang Cui<sup>A</sup> and Zheng-Jian Qi<sup>A,B</sup>

<sup>A</sup> College of Chemistry and Chemical engineering, Southeast University, Nanjing, Jiangsu 211189,  
PR China

<sup>B</sup> Corresponding author. Email: qizhengjian@seu.edu.cn

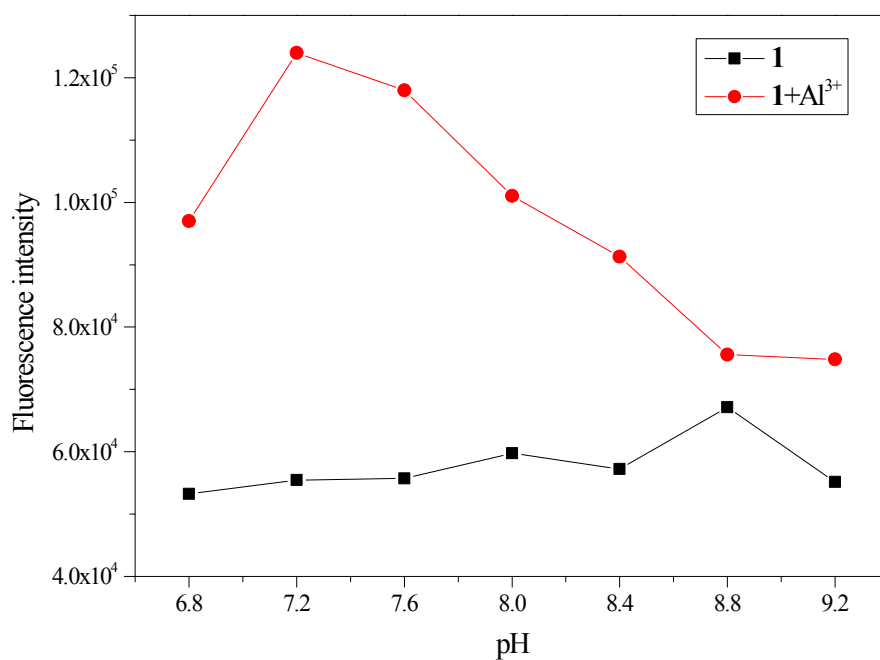

Fig.S1. The variation in fluorescence intensity with the pH of the Sensor 1 (10.0 μM) in the presence of Al<sup>3+</sup> (1.5 equiv.) at λ<sub>ex</sub> = 334nm.

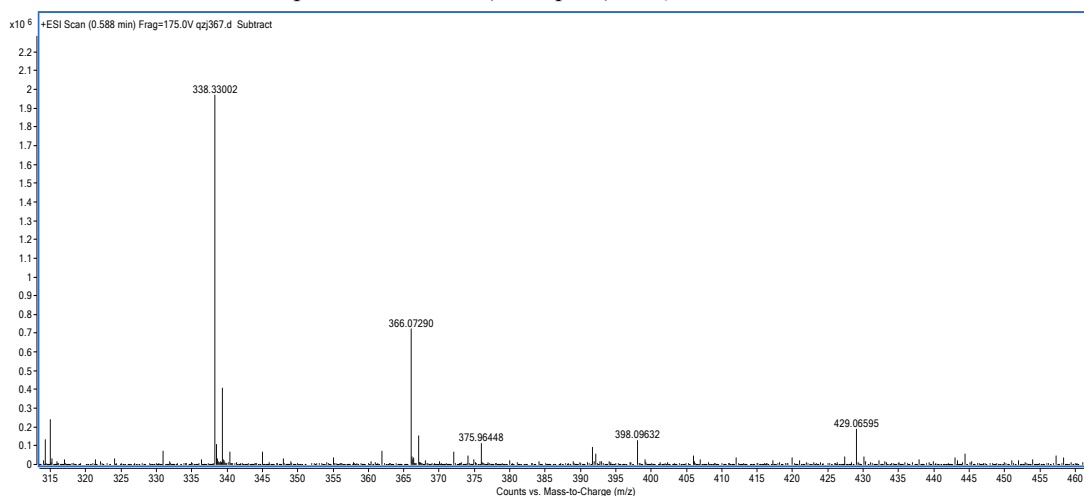

Fig.S2. Compound 1+Al<sup>3+</sup> EI-MS (m/z)

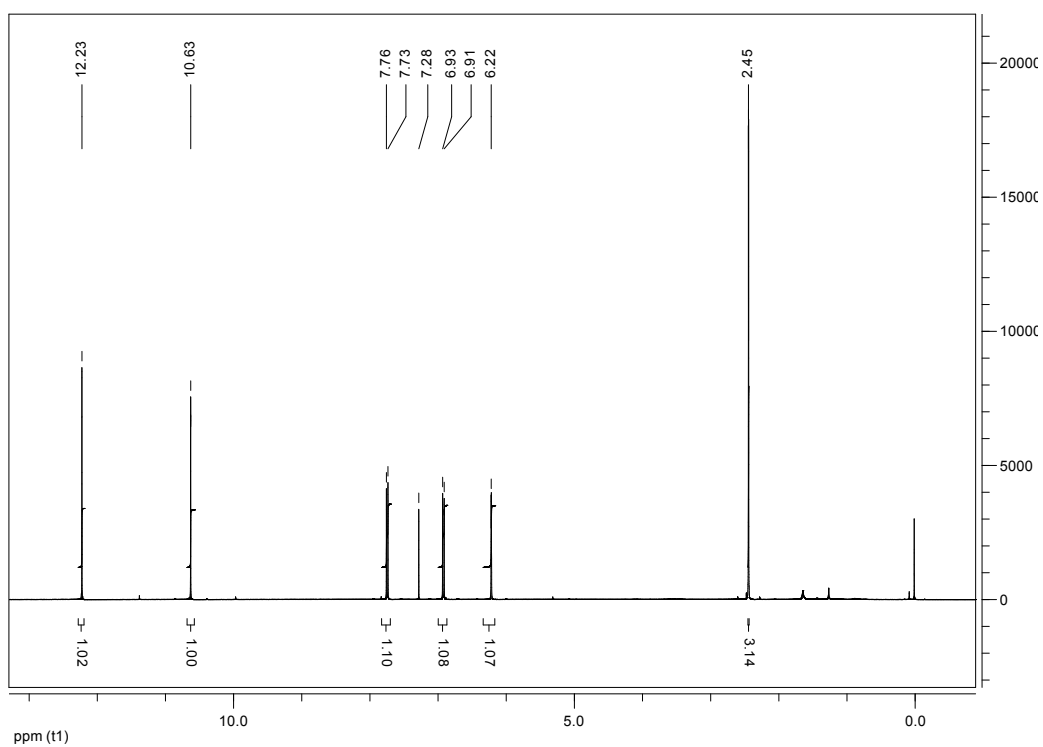

**Fig.S3.** 8-Formyl-7-hydroxy-4-methylcoumarin  $^1\text{H-NMR}$  ( $\text{CDCl}_3$ , 400MHz)

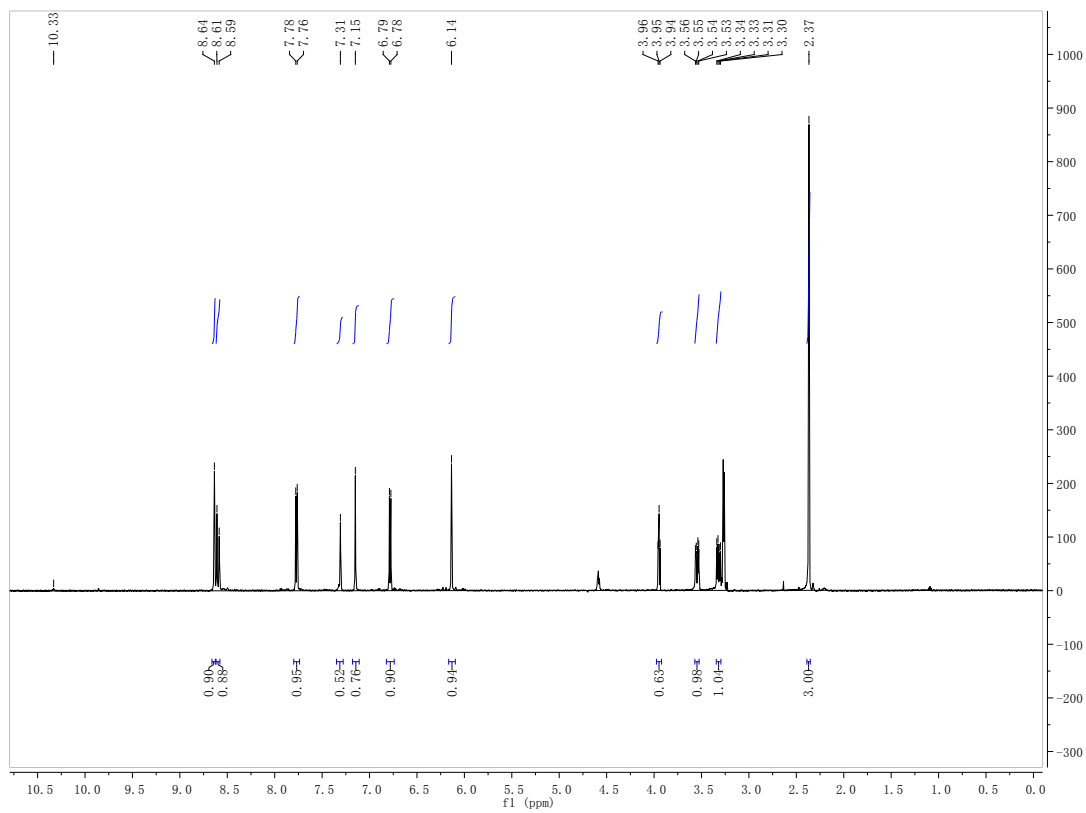

**Fig.S4.** Compound 1+ $\text{Al}^{3+}$   $^1\text{H-NMR}$  ( $\text{D}_2\text{O}$ , 600MHz)

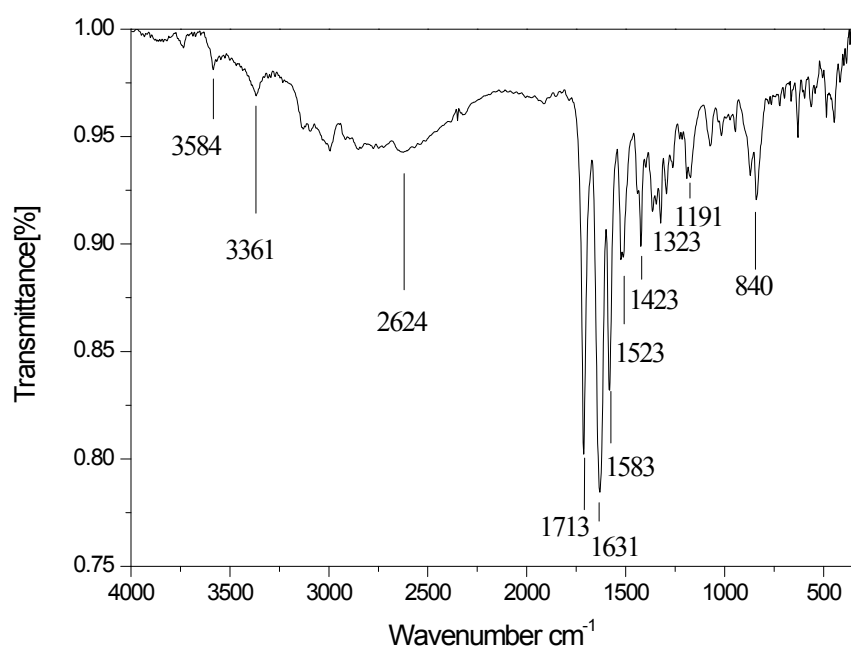

**Fig.S5.** Compound 1 FT-IR (KBr, cm<sup>-1</sup>)
